# Supplementary material
Source: PubMed Central journal article supplement (PMC6964738)
Supplement: JB.00608-19-s0001.pdf [file JB.00608-19-s0001.pdf]

## Supplementary Data

### D-Ribose catabolism in archaea:

#### Discovery of a novel oxidative pathway in *Haloarcula* species

Ulrike Johnsen<sup>1</sup>, Jan-Moritz Sutter<sup>1</sup>, Andreas Reinhardt<sup>1</sup>, Andreas Pickl<sup>1</sup>, Rui Wang<sup>2</sup>, Hua Xiang<sup>2</sup> and Peter Schönheit<sup>1\*</sup>

#### Table of contents

**Supplemental Figure S1** Verification of successful deletion of HAH\_0289, HAH\_0291 and HAH\_1276 in *Haloarcula hispanica* DF60.

**Supplemental Figure S2** Growth of *Haloarcula marismortui* on D-xylose and L-arabinose.

**Supplemental Figure S3** Growth of *Haloarcula hispanica* on D-xylose, D-ribose and L-arabinose.

**Supplemental Figure S4** Purification of pentose dehydrogenase from *Haloarcula marismortui* cells grown on D-ribose.

**Supplemental Figure S5** Pentonolactonase of *Haloarcula hispanica*.

**Supplemental Figure S6** Purification of xylonate dehydratase from *Haloarcula marismortui*.

**Supplemental Figure S7** Growth of the  $\Delta$ HVO\_B0038A mutant from *Haloferax volcanii* that was complemented with rrnAC0575 and rrnAC3032 from *Haloarcula marismortui*.

**Supplemental Figure S8** Purification of  $\alpha$ -ketoglutarate semialdehyde dehydrogenase from *Haloarcula marismortui*.

**Supplemental Table S1** Primer used in this study.

**Supplemental Figure S1 Verification of successful deletion of HAH\_0289, HAH\_0291 and HAH\_1276 in *Haloarcula hispanica* DF60.** (A)  $\Delta$ HAH\_0289 and  $\Delta$ HAH\_0291 mutants were analyzed by PCR with the forward primer of fragment 1 and the reverse primer of fragment 2; wild type (-) and plasmid (+) were used as control. (B)  $\Delta$ HAH\_1276 mutant was analyzed by Southern blot analysis with EcoR1 treated genomic DNA of wild type (wt) and the  $\Delta$ HAH\_1276 mutant. Length of specific signals were determined with the DNA molecular weight marker III, DIG-labeled (Roche Diagnostics). The probe was amplified with the PCR DIG Probe Synthesis Kit (Roche Diagnostics, Germany).

**A**

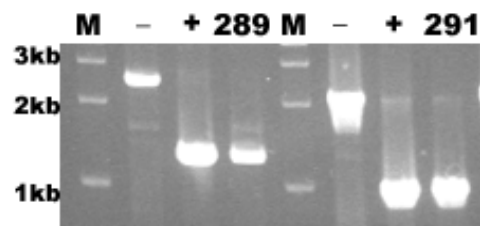

**B**

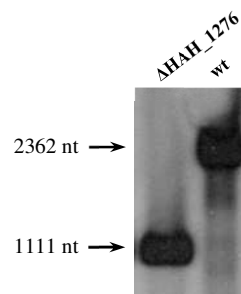

**Supplemental Figure S2 Growth of *Haloarcula marismortui* on D-xylose and L-arabinose.** Growth was performed at 37°C on 25 mM D-xylose (A) and L-arabinose (B) in the presence of 0.25% yeast extract and 0.5% casamino acids (circles); growth without the addition of pentoses (squares) and consumption of xylose or arabinose (triangles).

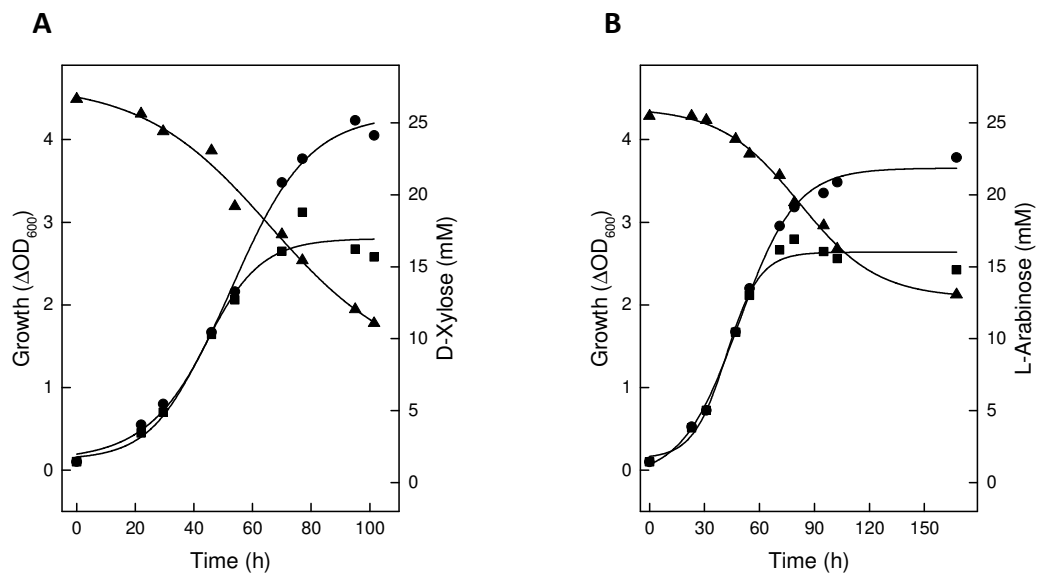

**Supplemental Figure S3 Growth of *Haloarcula hispanica* on D-xylose, D-ribose and L-arabinose.**

Growth was performed at 37°C on 25 mM D-xylose (circles), D-ribose (squares) and L-arabinose (triangles) in the presence of 1 g/l yeast extract; growth without the addition of pentoses (diamonds).

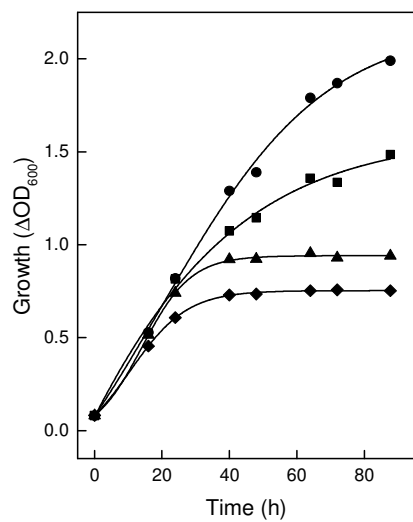

**Supplemental Figure S4 Purification of pentose dehydrogenase from *Haloarcula marismortui* cells grown on D-ribose.** (A) Purification as analyzed by SDS-PAGE, Coomassie blue stained; Lanes: 1, molecular mass standard; 2, cell extract; 3, after Sepharose CL 4B; 4, after Phenyl-Sepharose; 5, after Superdex 200; (B) Enzyme activity was measured at 37°C as NADP<sup>+</sup> dependent oxidation of D-ribose. The assay mixture contained 1.5 M KCl, 1 mM NADP<sup>+</sup> and 10 mM D-ribose in 100 mM Tris-HCl, pH 8.8.

**A**

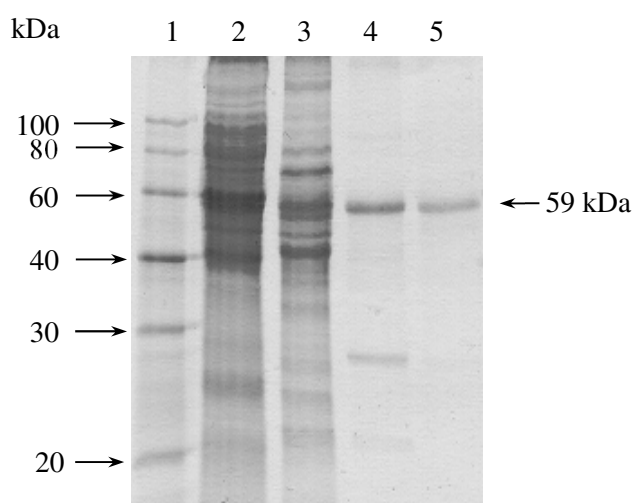

**B**

|                  | Protein (mg) | Activity (U) | Sp. activity (U/mg) | Yield (%) | Purification (fold) |
|------------------|--------------|--------------|---------------------|-----------|---------------------|
| Cell extract     | 985          | 232          | 0.235               | 100       | 1                   |
| Sepharose CL 4B  | 22           | 124          | 5.61                | 54        | 24                  |
| Phenyl-Sepharose | 1.14         | 40           | 36                  | 17        | 153                 |
| Superdex 200     | 0.12         | 7.3          | 62                  | 3.2       | 264                 |

**Supplemental Figure S5 Pentonolactonase of *Haloarcula hispanica*.** (A) Coomassie blue stained SDS-PAGE. Lanes: 1, molecular mass standard; 2, protein after Superdex 200. (B) Rate dependence of pentonolactonase on the concentration of ribonolactone.

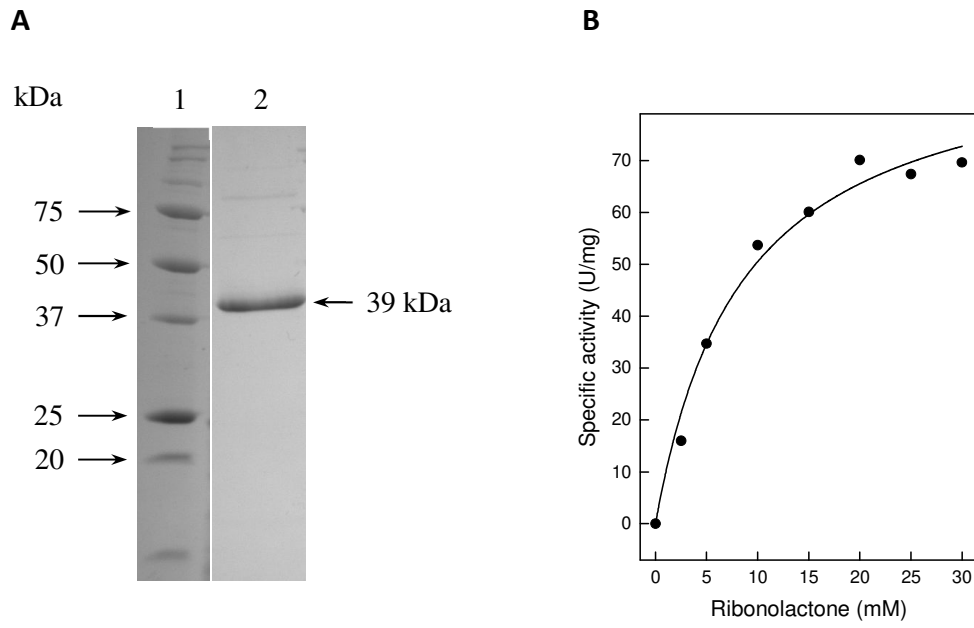

**Supplemental Figure S6 Purification of xylonate dehydratase from *Haloarcula marismortui*.** (A) Purification as analyzed by SDS-PAGE, Coomassie blue stained. Lanes: 1, molecular mass standard; 2, cell extract; 3, after Phenyl-Sepharose; 4, after Superdex 200. (B) Enzyme activity was measured at 37°C, the assay mixture contained 1.0 M KCl, 20 mM MgCl<sub>2</sub> and 10 mM D-xylonate in 100 mM Tris-HCl, pH 8.5.

**A**

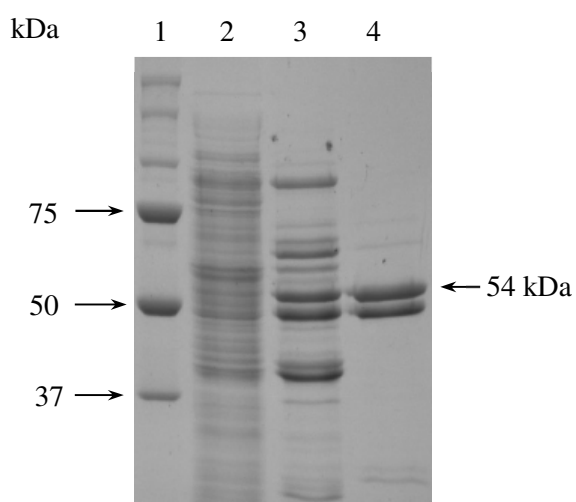

**B**

|                  | Protein (mg) | Activity (U) | Sp. activity (U/mg) | Yield (%) | Purification (fold) |
|------------------|--------------|--------------|---------------------|-----------|---------------------|
| Cell extract     | 601          | 0.145        | 0.00024             | 100       | 1                   |
| Phenyl-Sepharose | 2.81         | 0.0302       | 0.0108              | 20.8      | 45                  |
| Superdex 200     | 0.121        | 0.0072       | 0.06                | 5         | 250                 |

**Supplemental Figure S7 Growth of the  $\Delta$ HVO\_B0038A mutant from *Haloferax volcanii* that was complemented with *rrnAC0575* and *rrnAC3032* from *Haloarcula marismortui*. Growth on 20 mM L-arabinose (A) and 20 mM D-xylose (B).  $\Delta$ HVO\_B0038A mutant (diamonds); wild type (squares), and the  $\Delta$ HVO\_B0038A mutant complemented with *rrnAC0575* (circles) or *rrnAC3032* (triangles). Expression of the *Haloarcula marismortui* genes was induced by the addition of 0.1 mM tryptophan.**

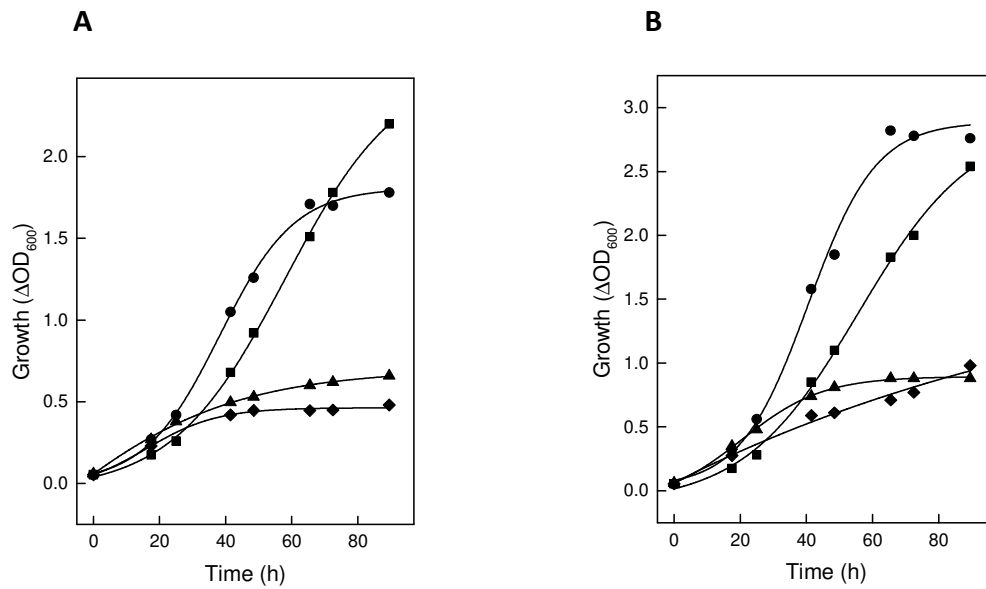



**Supplemental Figure S8 Purification of  $\alpha$ -ketoglutarate semialdehyde dehydrogenase from *Haloarcula marismortui*.** (A) Purification as analyzed by SDS-PAGE, Coomassie blue stained. Lanes: 1, molecular mass standard; 2, cell extract; 3, after Phenyl-Sepharose; 4, after Superdex 200. (B) Enzyme activity was measured at 37°C as NADP<sup>+</sup> dependent oxidation of glutardialdehyde. The assay mixture contained 1.5 M KCl, 1 mM NADP<sup>+</sup> and 5 mM glutardialdehyde in 100 mM Tris-HCl, pH 8.5.

**A**

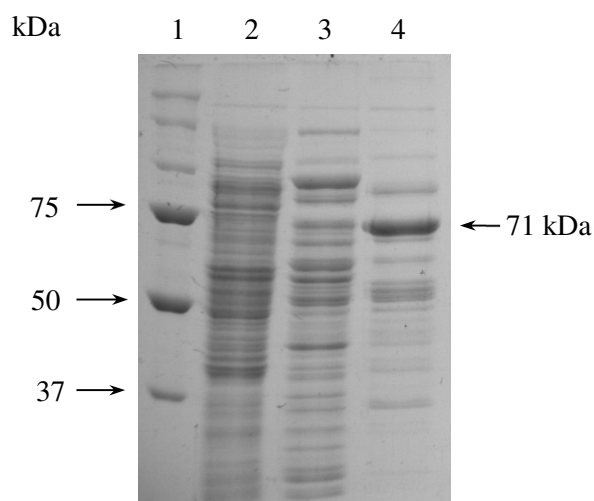

**B**

|                  | Protein (mg) | Activity (U) | Sp. activity (U/mg) | Yield (%) | Purification (fold) |
|------------------|--------------|--------------|---------------------|-----------|---------------------|
| Cell extract     | 695.4        | 44.4         | 0.056               | 100       | 1                   |
| Phenyl Sepharose | 28.62        | 13           | 0.454               | 29.3      | 8.1                 |
| Superdex 200     | 0.581        | 1.29         | 2.2                 | 2.9       | 39.3                |

**Supplemental Table S1 Primer used in this study.** F = forward; R = reverse; 5'-flanking region of target gene, fragment 1; 3'-flanking region of target gene, fragment 2.

| <b>Primer used for transcriptional analyses</b>                                      |                                                          |                                   |
|--------------------------------------------------------------------------------------|----------------------------------------------------------|-----------------------------------|
| <b>gene</b>                                                                          | <b>sequence 5'-&gt;3'</b>                                |                                   |
| <i>rrnAC3032</i>                                                                     | F_CAATCACGCGGAAACTATTCGGCG                               |                                   |
|                                                                                      | R_GTGTTTCGGTCTGGAGAATCGGTG                               |                                   |
| <i>rrnAC3033</i>                                                                     | F_CGACTGGTTCGTCCGCGACG                                   |                                   |
|                                                                                      | R_TGGAGCACCTTCGGGTCGCC                                   |                                   |
| <i>rrnAC3034</i>                                                                     | F_GTACGAGGAGTCCACGACG                                    |                                   |
|                                                                                      | R_ACTCCGTCTCGGATGCTTCG                                   |                                   |
| <i>rrnAC3036</i>                                                                     | F_GGACGCGGACGAAGCGGTTG                                   |                                   |
|                                                                                      | R_GCTCGGCATGACGACGGTCC                                   |                                   |
| <i>rrnAC1339</i>                                                                     | F_CTGGGGACGGTGTGTACGATTTG                                |                                   |
|                                                                                      | R_CTCACAGGTGCGTTTCATCTCGC                                |                                   |
| <i>rrnAC0575</i>                                                                     | F_GAAGAGGCTGACCCCGAGGC                                   |                                   |
|                                                                                      | R_CCCGGTCTCTCCGGAATCTC                                   |                                   |
| <b>Primer used for generation of deletion mutants</b>                                |                                                          |                                   |
| <b>gene</b>                                                                          | <b>flanking fragments</b>                                | <b>sequence 5'-&gt;3'</b>         |
| $\Delta$ HAH_1276                                                                    | fragment1                                                | F_GCGTCGTGGACTGTCTCTGAATCG        |
|                                                                                      |                                                          | R_CTCGACGACCAGGTCAGCGTAGTCTACGTCG |
|                                                                                      | fragment2                                                | F_CTGACCTGGTCGTCGAGGGCGACACCG     |
|                                                                                      |                                                          | R_CGGCAACTGTTCGAGAACCTCATCC       |
| $\Delta$ HAH_0289                                                                    | fragment1                                                | F_CGCGGATCCCCGGTGGGGTACGTCATC     |
|                                                                                      |                                                          | R_CCCAAGCTTTTGCCGACATACTGTGGTG    |
|                                                                                      | fragment2                                                | F_CCCAAGCTTCGGCACTGTTTTTCCCGGTA   |
|                                                                                      |                                                          | R_ATAGGGTACCCGCGGTGCGTTGCCAGATG   |
| $\Delta$ HAH_0291                                                                    | fragment1                                                | F_CGCGGATCCGGCGAGAAACGGGACCGGTATC |
|                                                                                      |                                                          | R_CCCAAGCTTGCCACTGCCATCGACTGGCT   |
|                                                                                      | fragment2                                                | F_CCCAAGCTTATGCGGTACGAGATTTTTTG   |
|                                                                                      |                                                          | R_CATGCCATGGCGGGTTCGTTGGTGCCAGTAA |
| <b>Primer used for cloning of plasmids for overexpression and/or complementation</b> |                                                          |                                   |
| <b>gene</b>                                                                          | <b>sequence 5'-&gt;3'</b>                                |                                   |
| <i>rrnAC0771</i>                                                                     | F_ATTGCGCATATGCACCACCACCACCACATGCATCTCGAAAAAGTAG<br>ACAC |                                   |
|                                                                                      | R_CCGGGTATCGGATCCGGCCTG                                  |                                   |
| HAH_0290                                                                             | F_GTTTCGGCCCATGGTTCAG                                    |                                   |
|                                                                                      | R_GCCACCGGATCCACGGTC                                     |                                   |
| <i>rrnAC3036</i>                                                                     | F_GAATTAACATGACGCAGACG                                   |                                   |
|                                                                                      | R_CTGTAACAAGGATCCACTTCACG                                |                                   |

|           |                           |
|-----------|---------------------------|
| rrnAC0575 | F_CAAGCGGGGCCATGGGAAAGGC  |
|           | R_ACGATGGGGGTGGATCCTTACGC |
| rrnAC3032 | F_TATGTCCGGCACATGTCGCCAAC |
|           | R_TCTATGACGGATCCGTACGCAGC |
| rrnAC3034 | F_CGACAGTGTGATGAACGTTGAC  |
|           | R_CGTTGACGGATCCATGTGCC    |
